# Supplementary material for: Cross-Talk between CB1, AT1, AT2 and Mas Receptors Responsible for Blood Pressure Control in the Paraventricular Nucleus of Hypothalamus in Conscious Spontaneously Hypertensive Rats and Their Normotensive Controls
Source: MDPI journal article supplement (doi:10.3390/cells11091542), 2022-05-04
Supplement: s1 [file s1]

## SUPPLEMENTARY MATERIAL

### Cross-talk between CB<sub>1</sub>, AT<sub>1</sub>, AT<sub>2</sub> and Mas receptors responsible for blood pressure control in the paraventricular nucleus of hypothalamus in conscious spontaneously hypertensive rats and their normotensive controls

Krzysztof Mińczuk, Eberhard Schlicker, Barbara Malinowska

#### CB<sub>1</sub>-R

From the left (rows):

standard (1), **PVN WKY** (2-7), **PVN SHR** (8-13), **RVLM WKY** (14-20), **RVLM SHR** (21-26)

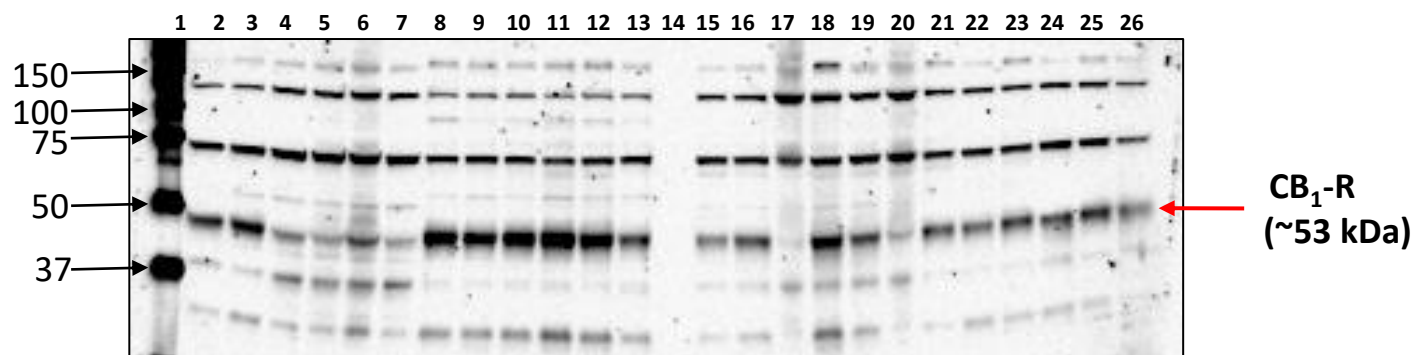

standard (1), **NTS WKY** (2-7), **NTS SHR** (8-13)

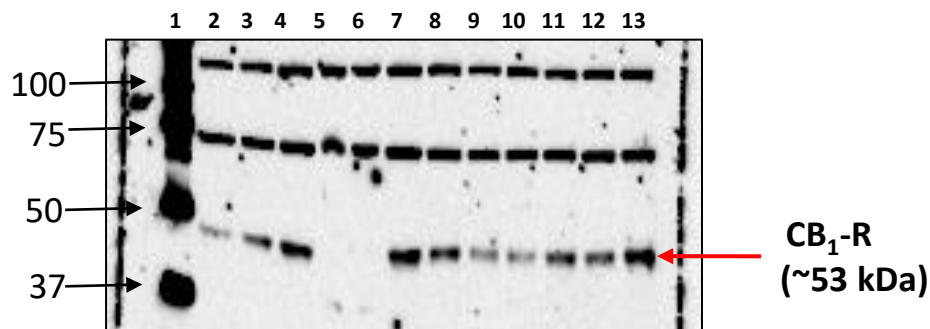

Figure S1a. Uncropped Western blots shown in Figure 7a.

## AT<sub>2</sub>-R

From the left (rows):

standard (1), **PVN WKY** (2-7), **PVN SHR** (8-13)

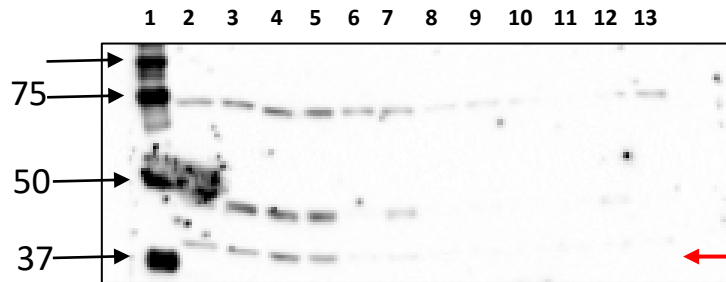

**RVLM WKY** (1-6), **RVLM SHR** (7-12)

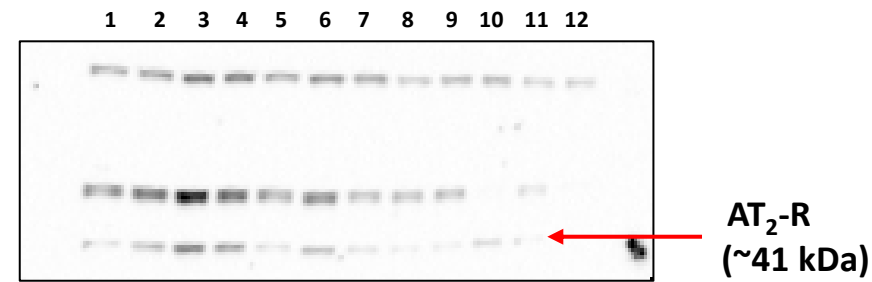

After gel -> membrane transfer, membrane was cut in half. Standard seen on the left picture applies to both.

**NTS WKY** (1-6), **NTS SHR** (7-12)

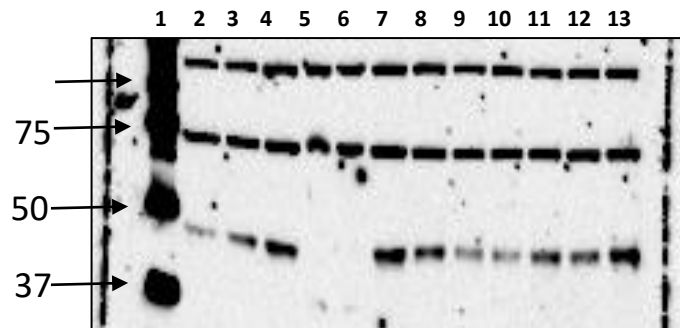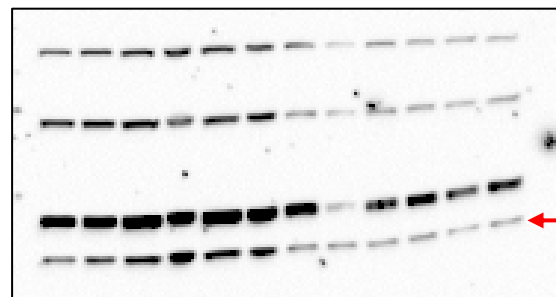

After gel -> membrane transfer, membrane was cut in half in order to use two different antibodies (CB<sub>1</sub>-R and AT<sub>2</sub>-R). Standard seen on the left picture applies to both.

Figure S1b. Uncropped Western blots shown in Figure 7b.

## Mas-R

From the left (rows):

standard (1), **PVN WKY** (2-7), **PVN SHR** (8-13), **RVLM WKY** (14-20), **RVLM SHR** (21-26)

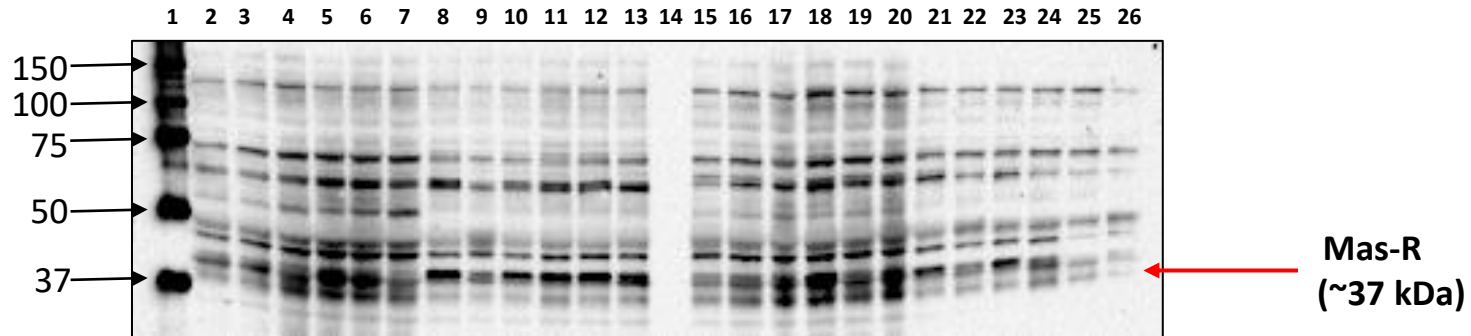

standard (1), **NTS WKY** (2-7), **NTS SHR** (8-13),

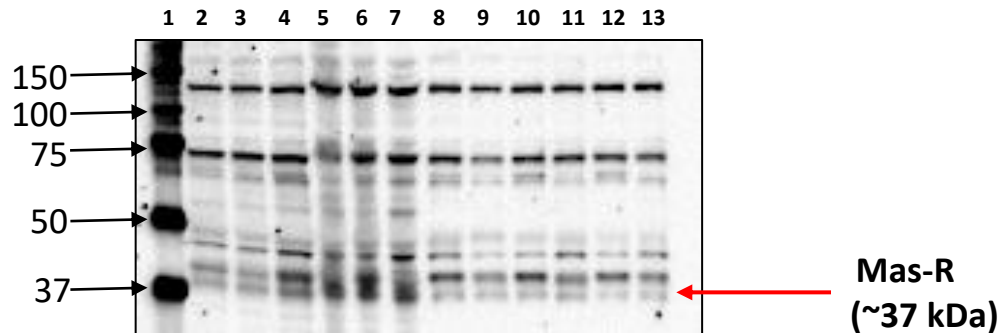

Figure S1c. Uncropped Western blots shown in Figure 7c.
